# Supplementary material for: Systematic Review of Safety and Efficacy of IL-1-Targeted Biologics in Treating Immune-Mediated Disorders
Source: PubMed Central journal article supplement (PMC9296857; doi:10.3389/fimmu.2022.888392), 2022-07-06
Supplement: Table_1.pdf [file Table_1.pdf]

**Table S1. Search terms.**

|    |                                                                               |      |
|----|-------------------------------------------------------------------------------|------|
| 1  | Anakinra                                                                      | 6302 |
| 2  | Anakinra AND adult's onset Still's disease                                    | 141  |
| 3  | Anakinra AND adult's onset Still's disease, filters: RCT                      | 2    |
| 4  | Anakinra AND Behcet                                                           | 62   |
| 5  | Anakinra AND CAPS                                                             | 150  |
| 6  | Anakinra AND cryopyrin-associated periodic syndromes                          | 136  |
| 7  | Anakinra AND deficiency in IL-1 receptor antagonist                           | 265  |
| 8  | Anakinra AND DIRA                                                             | 23   |
| 9  | Anakinra AND type 1 diabetes                                                  | 44   |
| 10 | Anakinra AND type 1 diabetes, filters: RCT                                    | 1    |
| 11 | Anakinra AND familial Mediterranean fever                                     | 146  |
| 12 | Anakinra AND FMF                                                              | 98   |
| 13 | Anakinra AND familial Mediterranean fever, filters: RCT                       | 2    |
| 14 | Anakinra AND gout                                                             | 89   |
| 15 | Anakinra AND gout, filters: RCT                                               | 2    |
| 16 | Anakinra AND graft versus host disease                                        | 13   |
| 17 | Anakinra AND GVHD                                                             | 7    |
| 18 | Anakinra AND graft versus host disease, filters: RCT                          | 1    |
| 19 | Anakinra AND hidradenitis suppurativa                                         | 26   |
| 20 | Anakinra AND acne inversa                                                     | 26   |
| 21 | Anakinra AND hidradenitis suppurativa, filters: RCT                           | 1    |
| 22 | Anakinra AND hyper IgD syndrome                                               | 57   |
| 23 | Anakinra AND HIDS                                                             | 27   |
| 24 | Anakinra AND macrophage activation syndrome                                   | 93   |
| 25 | Anakinra AND macrophage activation syndrome, filters: RCT                     | 2    |
| 26 | Anakinra AND Muckle Wells syndrome                                            | 177  |
| 27 | Anakinra AND Periodic fever aphthous stomatitis pharyngitis adenitis syndrome | 9    |
| 28 | Anakinra AND PFAPA                                                            | 12   |
| 29 | Anakinra AND psoriasis arthritis                                              | 38   |
| 30 | Anakinra AND psoriasis                                                        | 98   |
| 31 | Anakinra AND pyoderma gangrenosum                                             | 39   |
| 32 | Anakinra AND pyogenic arthritis, pyoderma gangrenosum, acne                   | 16   |
| 33 | Anakinra AND PAPA                                                             | 32   |
| 34 | Anakinra AND recurrent idiopathic pericarditis                                | 41   |
| 35 | Anakinra AND pericarditis                                                     | 71   |
| 36 | Anakinra AND recurrent idiopathic pericarditis, filters: RCT                  | 1    |
| 37 | Anakinra AND relapsing polychondritis                                         | 8    |
| 38 | Anakinra AND polychondritis                                                   | 9    |
| 39 | Anakinra AND rheumatoid arthritis                                             | 661  |
| 40 | Anakinra AND rheumatoid arthritis, filters: RCT                               | 36   |
| 41 | Anakinra AND Schnitzler syndrome                                              | 114  |
| 42 | Anakinra AND Sjögren syndrome                                                 | 18   |
| 43 | Anakinra AND Sjögren syndrome, filters: RCT                                   | 1    |
| 44 | Anakinra AND synovitis, acne, pustulosis, hyperhidrosis, osteitis             | 0    |
| 45 | Anakinra AND SAPHO                                                            | 14   |
| 46 | Anakinra AND systemic juvenile idiopathic arthritis                           | 151  |
| 47 | Anakinra AND systemic juvenile idiopathic arthritis, filters: RCT             | 2    |
| 48 | Anakinra AND systemic sclerosis                                               | 18   |
| 49 | Anakinra AND TNF receptor-associated periodic syndrome                        | 30   |
| 50 | Anakinra AND TRAPS                                                            | 57   |
| 51 | Anakinra AND urticarial vasculitis                                            | 7    |

|    |                                                                                  |     |
|----|----------------------------------------------------------------------------------|-----|
| 1  | Canakinumab                                                                      | 780 |
| 2  | Canakinumab AND adult's onset Still's disease                                    | 34  |
| 3  | Canakinumab AND adult's onset Still's disease, filters: RCT                      | 1   |
| 4  | Canakinumab AND Behcet                                                           | 36  |
| 5  | Canakinumab AND CAPS                                                             | 110 |
| 6  | Canakinumab AND cryopyrin-associated periodic syndromes                          | 115 |
| 7  | Canakinumab AND CAPS, filter: RCT                                                | 4   |
| 8  | Canakinumab AND deficiency in IL-1 receptor antagonist                           | 10  |
| 9  | Canakinumab AND DIRA                                                             | 7   |
| 10 | Canakinumab AND type 1 diabetes                                                  | 4   |
| 11 | Canakinumab AND type 1 diabetes, filters: RCT                                    | 1   |
| 12 | Canakinumab AND familial Mediterranean fever                                     | 89  |
| 13 | Canakinumab AND FMF                                                              | 67  |
| 14 | Canakinumab AND familial Mediterranean fever, filters: RCT                       | 3   |
| 15 | Canakinumab AND gout                                                             | 73  |
| 16 | Canakinumab AND gout, filters: RCT                                               | 6   |
| 17 | Canakinumab AND hidradenitis suppurativa                                         | 5   |
| 18 | Canakinumab AND acne inversa                                                     | 5   |
| 19 | Canakinumab AND hyper IgD syndrome                                               | 28  |
| 20 | Canakinumab AND HIDS                                                             | 10  |
| 21 | Canakinumab AND hyper IgD syndrome, filter: RCT                                  | 1   |
| 22 | Canakinumab AND macrophage activation syndrome                                   | 32  |
| 23 | Canakinumab AND macrophage activation syndrome, filters: RCT                     | 3   |
| 24 | Canakinumab AND Muckle Wells syndrome                                            | 103 |
| 25 | Canakinumab AND Muckle Wells syndrome, filter: RCT                               | 4   |
| 26 | Canakinumab AND periodic fever aphthous stomatitis pharyngitis adenitis syndrome | 4   |
| 27 | Canakinumab AND PFAPA                                                            | 4   |
| 28 | Canakinumab AND psoriasis arthritis                                              | 9   |
| 29 | Canakinumab AND psoriasis                                                        | 13  |
| 30 | Canakinumab AND pyoderma gangrenosum                                             | 12  |
| 31 | Canakinumab AND pyogenic arthritis, pyoderma gangrenosum, acne                   | 5   |
| 32 | Canakinumab AND PAPA                                                             | 8   |
| 33 | Canakinumab AND recurrent idiopathic pericarditis                                | 8   |
| 34 | Canakinumab AND pericarditis                                                     | 12  |
| 35 | Canakinumab AND rheumatoid arthritis                                             | 58  |
| 36 | Canakinumab AND rheumatoid arthritis, filters: RCT                               | 3   |
| 37 | Canakinumab AND Schnitzler syndrome                                              | 18  |
| 38 | Canakinumab AND Schnitzler syndrome, filters: RCT                                | 2   |
| 39 | Canakinumab AND synovitis, acne, pustulosis, hyperhidrosis, osteitis             | 0   |
| 40 | Canakinumab AND SAPHO                                                            | 3   |
| 41 | Canakinumab AND systemic juvenile idiopathic arthritis                           | 77  |
| 42 | Canakinumab AND systemic juvenile idiopathic arthritis, filters: RCT             | 6   |
| 43 | Canakinumab AND TNF receptor-associated periodic syndrome                        | 13  |
| 44 | Canakinumab AND TRAPS                                                            | 26  |
| 45 | Canakinumab AND TRAPS, filter: RCT                                               | 1   |
| 46 | Canakinumab AND urticarial vasculitis                                            | 2   |

|    |                                                                                 |     |
|----|---------------------------------------------------------------------------------|-----|
| 1  | Rilonacept                                                                      | 178 |
| 2  | Rilonacept AND adult's onset Still's disease                                    | 15  |
| 3  | Rilonacept AND Behcet                                                           | 4   |
| 4  | Rilonacept AND CAPS                                                             | 47  |
| 5  | Rilonacept AND cryopyrin-associated periodic syndromes                          | 41  |
| 6  | Rilonacept AND CAPS, filter: RCT                                                | 1   |
| 7  | Rilonacept AND deficiency in IL-1 receptor antagonist                           | 8   |
| 8  | Rilonacept AND DIRA                                                             | 6   |
| 9  | Rilonacept AND type 1 diabetes                                                  | 3   |
| 10 | Rilonacept AND type 1 diabetes, filters: RCT                                    | 1   |
| 11 | Rilonacept AND familial Mediterranean fever                                     | 33  |
| 12 | Rilonacept AND FMF                                                              | 23  |
| 13 | Rilonacept AND familial Mediterranean fever, filters: RCT                       | 5   |
| 14 | Rilonacept AND gout                                                             | 42  |
| 15 | Rilonacept AND gout, filters: RCT                                               | 6   |
| 16 | Rilonacept AND hidradenitis suppurativa                                         | 2   |
| 17 | Rilonacept AND acne inversa                                                     | 2   |
| 18 | Rilonacept AND hyper IgD syndrome                                               | 5   |
| 19 | Rilonacept AND HIDS                                                             | 5   |
| 20 | Rilonacept AND macrophage activation syndrome                                   | 6   |
| 21 | Rilonacept AND Muckle Wells syndrome                                            | 36  |
| 22 | Rilonacept AND Muckle Wells syndrome, filter: RCT                               | 1   |
| 23 | Rilonacept AND periodic fever aphthous stomatitis pharyngitis adenitis syndrome | 3   |
| 24 | Rilonacept AND PFAPA                                                            | 3   |
| 25 | Rilonacept AND psoriasis arthritis                                              | 2   |
| 26 | Rilonacept AND psoriasis                                                        | 3   |
| 27 | Rilonacept AND pyoderma gangrenosum                                             | 2   |
| 28 | Rilonacept AND pyogenic arthritis, pyoderma gangrenosum, acne                   | 1   |
| 29 | Rilonacept AND PAPA                                                             | 2   |
| 30 | Rilonacept AND recurrent idiopathic pericarditis                                | 10  |
| 31 | Rilonacept AND pericarditis                                                     | 27  |
| 32 | Rilonacept AND pericarditis, filters: RCT                                       | 2   |
| 33 | Rilonacept AND rheumatoid arthritis                                             | 20  |
| 34 | Rilonacept AND Schnitzler syndrome                                              | 6   |
| 35 | Rilonacept AND synovitis, acne, pustulosis, hyperhidrosis, osteitis             | 0   |
| 36 | Rilonacept AND SAPHO                                                            | 1   |
| 37 | Rilonacept AND systemic juvenile idiopathic arthritis                           | 28  |
| 38 | Rilonacept AND systemic juvenile idiopathic arthritis, filters: RCT             | 6   |
| 39 | Rilonacept AND TNF receptor-associated periodic syndrome                        | 3   |
| 40 | Rilonacept AND TRAPS                                                            | 8   |
| 41 | Rilonacept AND systemic sclerosis                                               | 3   |

|   |                                              |    |
|---|----------------------------------------------|----|
| 1 | Gevokizumab                                  | 51 |
| 2 | Gevokizumab AND Behcet                       | 15 |
| 3 | Gevokizumab AND Behcet, filters: RCT         | 2  |
| 4 | Gevokizumab AND type 1 diabetes              | 3  |
| 5 | Gevokizumab AND type 1 diabetes, filters RCT | 1  |
| 6 | Gevokizumab AND psoriasis                    | 2  |

|   |                                                                |    |
|---|----------------------------------------------------------------|----|
| 1 | Bermekimab OR MABp1                                            | 49 |
| 2 | Bermekimab OR MABp1 AND hidradenitis suppurativa               | 5  |
| 3 | Bermekimab OR MABp1 AND hidradenitis suppurativa, filters: RCT | 3  |
