# Supplementary material for: Systematic Review of Safety and Efficacy of IL-1-Targeted Biologics in Treating Immune-Mediated Disorders
Source: PubMed Central journal article supplement (PMC9296857; doi:10.3389/fimmu.2022.888392), 2022-07-06
Supplement: Table_3.pdf [file Table_3.pdf]

**Table S3. Specific reasons for exclusion.**

| <b>Full-text articles excluded not matching inclusion criteria<br/>(n = 404)</b> |                                                                                                                                                                                                                                                                                                       |
|----------------------------------------------------------------------------------|-------------------------------------------------------------------------------------------------------------------------------------------------------------------------------------------------------------------------------------------------------------------------------------------------------|
| <b>ANK</b>                                                                       | (n = 273)<br><br>Different disease or study drug (n = 97)<br>Non-RCT (n = 7)<br>Others (n = 20)<br>Post-hoc analysis (n = 1)<br>Retrospective analysis (n = 3)<br>Review (n = 5)<br>Study size less than 3 patients (n = 99)<br>Study without primary endpoint of interest (n = 41)                   |
| <b>BER</b>                                                                       | (n = 2)<br><br>Non RCT (n = 2)                                                                                                                                                                                                                                                                        |
| <b>CAN</b>                                                                       | (n = 55)<br><br>Different disease or study drug (n = 21)<br>Non-RCT (n = 4)<br>Other (n = 3)<br>Retrospective analysis (n = 3)<br>Review (n = 3)<br>Study included two diseases of interest (n = 3)<br>Study size less than 3 patients (n = 11)<br>Study without primary endpoint of interest (n = 7) |
| <b>GEV</b>                                                                       | (n = 4)<br><br>Different disease or study drug (n = 2)<br>Non-RCT (n = 1)<br>Study size less than 3 patients (n = 1)                                                                                                                                                                                  |
| <b>RIL</b>                                                                       | (n = 70)<br><br>Different disease or study drug (n = 9)<br>Non-RCT (n = 3)<br>Others (n = 3)<br>Review (n = 48)<br>Study size less than 3 patients (n = 1)<br>Study without primary endpoint of interest (n = 6)                                                                                      |

**Abbreviations:**

ANK, anakinra; BER, bermekimab; CAN, canakinumab; GEV, gevokizumab; RCT, randomized controlled trial; RIL, rilonacept,
