# Supplementary material for: Systematic Review of Safety and Efficacy of IL-1-Targeted Biologics in Treating Immune-Mediated Disorders
Source: PubMed Central journal article supplement (PMC9296857; doi:10.3389/fimmu.2022.888392), 2022-07-06
Supplement: Table_5.pdf [file Table_5.pdf]

**Table S5. Risk of bias.**

| Study                   | Bias score | Study                                 | Bias score |
|-------------------------|------------|---------------------------------------|------------|
| Nordström et al. (18)   | 20         | Moran et al. (87)                     | 25         |
| Grayson et al. (21)     | 13         | Kedor et al.(19)                      | 27         |
| Cantarini et al. (22)   | 6          | Vitale et al. (2823)                  | 6          |
| Kullenberg et al. (25)  | 12         | Lachmann et al. (31)                  | 26         |
| Lepore et al. (26)      | 16         | Koné-Paut et al. (32)                 | 24         |
| Eskola et al. (27)      | 7          | De Benedetti et al. (37)              | 26         |
| Sibley et al. (28)      | 19         | Ozen et al. (36)                      | 27         |
| Ben-Zvi et al. (35)     | 26         | Schlesinger, Mysler et al. (43)       | 27         |
| Janssen et al. (39)     | 23         | Schlesinger, Meulemeester et al. (41) | 24         |
| Antin et al. (49)       | 21         | Schlesinger (42)                      | 27         |
| Tzatanekou et al. (50)  | 26         | So et al. (40)                        | 25         |
| Bodar et al. (52)       | 8          | Kolios et al. (56)                    | 12         |
| Shakoory et al. (53)    | 22         | Alten et al. (72)                     | 26         |
| Kuemmerle et al. (30)   | 20         | Krause et al. (76)                    | 21         |
| Kuemmerle et al. (29)   | 17         | Ruperto et al. (83)                   | 19         |
| Jung et al. (54)        | 14         | Ruperto et al. (82)                   | 21         |
| Beynon et al. (55)      | 6          | Krause et al. (90)                    | 14         |
| Brucato et al. (57)     | 26         | Petryna et al. (20)                   | 8          |
| Niu et al. (70)         | 17         | Hoffman et al. (33)                   | 26         |
| Bao et al. (69)         | 22         | Garg et al. (34)                      | 18         |
| Fleischmann et al. (68) | 18         | Hashkes et al. (38)                   | 23         |
| Bresnihan et al. (67)   | 25         | Terkeltaub (48)                       | 24         |
| Genovese et al. (66)    | 25         | Schumacher, Evans et al. (44)         | 24         |
| Tesser et al. (65)      | 20         | Schumacher, Sundy et al. (45)         | 23         |
| Cohen et al. (64)       | 24         | Mitha et al. (46)                     | 25         |
| Fleischmann et al. (63) | 23         | Sundy et al. (47)                     | 26         |
| Cohen et al. (62)       | 23         | Klein et al. (58)                     | 27         |
| Nuki et al. (61)        | 24         | Krause et al. (77)                    | 19         |
| Scott et al. (71)       | 22         | Lovell et al. (84)                    | 21         |
| Cohen et al. (60)       | 27         | Ilowite et al. (85)                   | 26         |
| Bresnihan et al. (59)   | 25         | White et al. (89)                     | 14         |
| Wendling et al. (79)    | 12         | Tugal-Tutkun et al. (24)              | 24         |
| Rowczenio et al. (73)   | 6          | Seelig et al. (88)                    | 21         |
| Gran et al. (74)        | 5          | Kanni et al. (51)                     | 21         |
| de Koning et al. (75)   | 7          |                                       |            |
| Norheim et al (78)      | 23         |                                       |            |
| Ilowite et al (80)      | 21         |                                       |            |
| Quartier et al. (81)    | 26         |                                       |            |
| Gattorno et al. (86)    | 9          |                                       |            |

**Legend:**  
Risk of bias  
Low (23-28 points)  
Medium (15-22 points)  
High (0-14 points)
